# Supplementary material for: Dynamic population stage structure due to juvenile–adult asymmetry stabilizes complex ecological communities
Source: PubMed Central journal article supplement — Proc Natl Acad Sci U S A. 2021 May 21;118(21):e2023709118. doi: 10.1073/pnas.2023709118 (PMC8166188; doi:10.1073/pnas.2023709118), 2021-05-21
Supplement: pnas.2023709118.sapp.pdf [file pnas.2023709118.sapp.pdf]

1

## 2 **Supplementary Information for**

3 **Dynamic population stage-structure due to juvenile-adult asymmetry stabilises complex**  
4 **ecological communities**

5 **André M. de Roos**

6 **Corresponding Author: André M. de Roos.**

7 **E-mail: [A.M.deRoos@uva.nl](mailto:A.M.deRoos@uva.nl)**

### 8 **This PDF file includes:**

- 9     Supplementary text
- 10    Figs. S1 to S10 (not allowed for Brief Reports)
- 11    SI References

## 12 Supporting Information Text

### 13 Model reformulation and analysis

14 The stage-structured model in terms of the juvenile and adult densities  $J_i$  and  $A_i$ , respectively, can be reformulated into a  
 15 model in terms of the total number of individuals of species  $i$  and the fraction of juveniles in the population of species  $i$ . Define  
 16  $C_i$  as the total density,  $C_i = J_i + A_i$ , and  $Z_i$  as the fraction of juveniles of species  $i$ ,  $Z_i = J_i/C_i$ . Using these alternative  
 17 model variables the functional response value for the basal species can be written as:

$$18 \quad F_1 = \frac{P}{\delta + \alpha_1 (qZ_1 + (2-q)(1-Z_1)) C_1} \quad [1]$$

19 and the encounter rate of all non-basal species with their prey as

$$20 \quad E_i = \sum_{k < i} \psi_{ik} (\phi Z_k + (2-\phi)(1-Z_k)) C_k \quad [2]$$

21 From the ordinary differential equations (ODEs) for the juvenile and adult densities  $J_i$  and  $A_i$  presented in the Materials  
 22 and Methods section, the following system of ODEs for the alternative model variables  $C_i$  and  $Z_i$  can then be derived through  
 23 analytical manipulation:

$$24 \quad \frac{dC_i}{dt} = b_i(F_i)(1-Z_i)C_i - \mu_i C_i$$

$$25 \quad - (\phi Z_i + (2-\phi)(1-Z_i)) C_i \sum_{k > i} \alpha_k \psi_{ki} \frac{(qZ_k + (2-q)(1-Z_k)) C_k}{H_k + E_k} \quad [3]$$

$$26 \quad \frac{dZ_i}{dt} = b_i(F_i)(1-Z_i)^2 - m_i(F_i)Z_i$$

$$27 \quad - 2(\phi-1)(1-Z_i)Z_i \sum_{k > i} \alpha_k \psi_{ki} \frac{(qZ_k + (2-q)(1-Z_k)) C_k}{H_k + E_k} \quad [4]$$

28 **Model simplification in case of ontogenetic symmetry.** Assuming ontogenetic symmetry in ingestion and per-capita predation  
 29 risk between juveniles and adults is equivalent to setting both  $q$  and  $\phi$  equal to 1, which simplifies the per-capita reproduction  
 30 and maturation rate to:

$$31 \quad b_i(F_i) = m_i(F_i) = \max(\gamma_i F_i - T_i, 0)$$

32 while the expressions for the encounter rate of non-basal species with their prey,  $E_i$ , equals:

$$33 \quad E_i = \sum_{k < i} \psi_{ik} C_k \quad [5]$$

34 The functional response for species  $i$  is hence given by:

$$35 \quad F_i = \begin{cases} \frac{P}{\delta + \alpha_1 C_1} & i = 1 \\ \frac{\sum_{k < i} \psi_{ik} C_k}{H_i + \sum_{k < i} \psi_{ik} C_k} & \text{otherwise} \end{cases} \quad [6]$$

36 The equations describing the dynamics of total species densities  $C_i$  and fractions of juveniles  $Z_i$  therefore simplify to:

$$37 \quad \frac{dC_i}{dt} = \max(\gamma_i F_i - T_i, 0) (1-Z_i)C_i - \mu_i C_i - \sum_{k > i} \alpha_k \psi_{ki} \frac{C_k}{H_k + E_k} C_i \quad [7]$$

$$38 \quad \frac{dZ_i}{dt} = \max(\gamma_i F_i - T_i, 0) (1 - 3Z_i + Z_i^2) \quad [8]$$

39 For all populations (basal and non-basal) the dynamics of the fraction of juveniles  $Z_i$  hence follows a separable function,  
 40 consisting of a factor  $\max(\gamma_i F_i - T_i, 0)$  that only depends on the total species densities  $C_i$  and a factor  $(1 - 3Z_i + Z_i^2)$  that only  
 41 depends on the fraction of juveniles  $Z_i$ . Irrespective of the fluctuations in the total species densities  $C_i$ , the fraction of juveniles  
 42 in each population will therefore approach the unique root in the interval  $[0,1]$  of the quadratic condition  $(1 - 3Z_i + Z_i^2) = 0$   
 43 for  $t \rightarrow \infty$ , i.e. approach the constant value:

$$44 \quad \bar{Z} = \frac{3}{2} - \frac{1}{2}\sqrt{5} \approx 0.38 \quad [9]$$

45 In the long run the dynamics of this juvenile-adult abundance model are therefore captured by a model that only considers  
 46 total species abundances:

$$47 \quad \frac{dC_i}{dt} = \max(\gamma_i F_i - T_i, 0) (1 - \bar{Z})C_i - \mu_i C_i - \sum_{k > i} \alpha_k \psi_{ki} \frac{C_k}{H_k + E_k} C_i \quad [10]$$

48 with  $E_i$  and  $F_i$  given by Eq. (5) and Eq. (6), respectively.

49 **Computing eigenvalues of the stage-structured model.** To verify the local stability of the community states that appear to be  
50 stable based on numerical simulations I compute the eigenvalues characterising the dynamics in the neighbourhood of the  
51 equilibrium using the Jacobian matrix. In the neighbourhood of an equilibrium of the stage-structured model persistence  
52 of a species in the community guarantees that starvation does not occur for the juveniles nor the adults. In such a close  
53 neighbourhood of an equilibrium state the reproduction and maturation rate of adult and juvenile consumers are therefore  
54 necessarily positive, such that

$$55 \quad b_i(F_i) = \max((2-q)\gamma_i F_i - T_i, 0) = (2-q)\gamma_i F_i - T_i \quad [11]$$

$$56 \quad m_i(F_i) = \max(q\gamma_i F_i - T_i, 0) = q\gamma_i F_i - T_i \quad [12]$$

57 The dynamics of the total species densities  $C_i$  and the fraction of juveniles in the populations  $Z_i$  can then be described by  
58 simplified versions of the ODEs. (3) and (4):

$$59 \quad \frac{dC_i}{dt} = ((2-q)\gamma_i F_i - T_i)(1-Z_i)C_i - \mu_i C_i$$

$$60 \quad - (\phi Z_i + (2-\phi)(1-Z_i)) C_i \sum_{k>i} \alpha_k \psi_{ki} \frac{(qZ_k + (2-q)(1-Z_k)) C_k}{H_k + E_k} \quad [13]$$

$$61 \quad \frac{dZ_i}{dt} = ((2-q)\gamma_i F_i - T_i)(1-Z_i)^2 - (q\gamma_i F_i - T_i) Z_i$$

$$62 \quad - 2(\phi-1)(1-Z_i) Z_i \sum_{k>i} \alpha_k \psi_{ki} \frac{(qZ_k + (2-q)(1-Z_k)) C_k}{H_k + E_k} \quad [14]$$

63 The whole system of differential equations can be summarised as:

$$64 \quad \frac{d\mathbf{C}}{dt} = \mathbf{K}(\mathbf{C}, \mathbf{Z}) \quad [15]$$

$$65 \quad \frac{d\mathbf{Z}}{dt} = \mathbf{L}(\mathbf{C}, \mathbf{Z}) \quad [16]$$

66 in which  $\mathbf{C}$  and  $\mathbf{Z}$  are the vectors of total species abundances and fractions of juveniles in all populations, respectively. The  
67 vector-valued functions  $\mathbf{K}(\mathbf{C}, \mathbf{Z})$  and  $\mathbf{L}(\mathbf{C}, \mathbf{Z})$  contain the right-hand side of the ODEs  $dC_i/dt$  (13) and  $dZ_i/dt$  (14) for the  
68 species-density subsystem, respectively.

69 For a community with  $m$  species the Jacobian matrix of this model is a  $2m \times 2m$  matrix  $\mathbf{J}$  of the form:

$$70 \quad \mathbf{J} = \begin{pmatrix} \frac{\partial \mathbf{K}}{\partial \mathbf{C}} & \frac{\partial \mathbf{K}}{\partial \mathbf{Z}} \\ \frac{\partial \mathbf{L}}{\partial \mathbf{C}} & \frac{\partial \mathbf{L}}{\partial \mathbf{Z}} \end{pmatrix} = \begin{pmatrix} \mathbf{V}^1 + \mathbf{W}^1 & \mathbf{V}^2 + \mathbf{W}^2 \\ \mathbf{V}^3 + \mathbf{W}^3 & \mathbf{V}^4 + \mathbf{W}^4 \end{pmatrix} \quad [17]$$

71 Each of the 4 parts of  $J$  is a  $m \times m$  matrix containing the partial derivatives of the functions  $\mathbf{K}(\mathbf{C}, \mathbf{Z})$  and  $\mathbf{L}(\mathbf{C}, \mathbf{Z})$  with  
72 respect to the total species densities  $(C_1, \dots, C_m)$  and fractions of juveniles  $(Z_1, \dots, Z_m)$ .  $\mathbf{V}^1$ ,  $\mathbf{V}^2$ ,  $\mathbf{V}^3$  and  $\mathbf{V}^4$  are 4  $m \times m$   
73 matrices that capture the direct effects of two species in the community on each other, while  $\mathbf{W}^1$ ,  $\mathbf{W}^2$ ,  $\mathbf{W}^3$  and  $\mathbf{W}^4$  are 4  
74  $m \times m$  matrices that capture the indirect effects between two species that operates through a third species. More specifically,  
75 indirect effects occur between species because changes in the total density  $C_j$  and the fraction of juveniles  $Z_j$  influence the  
76 encounter rate  $E_k$  of a consumer species  $k$ , which in turn affects the predation rate of species  $k$  on species  $i$  (last summation  
77 terms in ODEs above). Indirect effects hence involve interactions between a predator species  $k$  and two of its prey species with  
78 indices  $i$  and  $j$ .

79 The elements of the matrices  $\mathbf{V}^1$ ,  $\mathbf{V}^2$ ,  $\mathbf{V}^3$  and  $\mathbf{V}^4$  are defined as:

$$80 \quad V_{i,j}^1 = \frac{d}{dC_j} (dC_i/dt), \quad V_{i,j}^2 = \frac{d}{dZ_j} (dC_i/dt), \quad V_{i,j}^3 = \frac{d}{dC_j} (dZ_i/dt), \quad V_{i,j}^4 = \frac{d}{dZ_j} (dZ_i/dt)$$

81 Notice however that the derivatives with respect to  $C_j$  and  $Z_j$  in these expressions are evaluated while ignoring the indirect  
82 effects that will be captured by the matrices  $\mathbf{W}^1$ ,  $\mathbf{W}^2$ ,  $\mathbf{W}^3$  and  $\mathbf{W}^4$ , that is, while treating the quantities  $E_k$  in the predation  
83 mortality terms (last summation terms in ODEs (13) and (14)) as constants.

84 The entries  $V_{ij}^1$  are given by:

$$85 \quad V_{ij}^1 = \begin{cases} \left( (2-q)\gamma_1 \frac{\delta F_1^2}{P} - T_1 \right) (1-Z_1) - \mu_1 \\ - (\phi Z_1 + (2-\phi)(1-Z_1)) \sum_{k>1} \alpha_k \psi_{k1} \frac{(qZ_k + (2-q)(1-Z_k)) C_k}{H_k + E_k} & i = j = 1 \\ ((2-q)\gamma_i F_i - T_i) (1-Z_i) - \mu_i \\ - (\phi Z_i + (2-\phi)(1-Z_i)) \sum_{k>i} \alpha_k \psi_{ki} \frac{(qZ_k + (2-q)(1-Z_k)) C_k}{H_k + E_k} & i = j \neq 1 \\ -\alpha_j \psi_{ji} \frac{(qZ_j + (2-q)(1-Z_j))}{H_j + E_j} (\phi Z_i + (2-\phi)(1-Z_i)) C_i & i < j \\ (2-q)\gamma_i \frac{H_i}{(H_i + E_i)^2} \psi_{ij} (\phi Z_j + (2-\phi)(1-Z_j)) (1-Z_i) C_i & i > j \end{cases} \quad [18]$$

86 In the above expressions for the matrix elements  $V_{ij}^1$  with  $i > j$  I have used the identities

$$87 \quad \frac{dF_i}{dC_j} = \frac{dF_i}{dE_i} \frac{dE_i}{dC_j} = \frac{H_i}{(H_i + E_i)^2} \frac{dE_i}{dC_j} = \frac{H_i}{(H_i + E_i)^2} \psi_{ij} (\phi Z_j + (2-\phi)(1-Z_j))$$

88 and

$$89 \quad \frac{d(F_1 C_1)}{dC_1} = \frac{d}{dC_1} \frac{PC_1}{\delta + \alpha_1 (qZ_1 + (2-q)(1-Z_1)) C_1}$$

$$90 \quad = \frac{\delta P}{(\delta + \alpha_1 (qZ_1 + (2-q)(1-Z_1)) C_1)^2}$$

$$91 \quad = \frac{\delta F_1^2}{P}$$

92 In an equilibrium state all per-capita growth rates  $(dC_i/dt)/C_i$  vanish such that the entries of the matrix  $\mathbf{V}^1$  simplify to:

$$93 \quad V_{ij}^1 = \begin{cases} (2-q)\gamma_1 \left( \frac{\delta F_1}{P} - 1 \right) F_1 (1-Z_1) & i = j = 1 \\ 0 & i = j \neq 1 \\ -\alpha_j \psi_{ji} \frac{(qZ_j + (2-q)(1-Z_j))}{H_j + E_j} (\phi Z_i + (2-\phi)(1-Z_i)) C_i & i < j \\ (2-q)\gamma_i \frac{H_i}{(H_i + E_i)^2} \psi_{ij} (\phi Z_j + (2-\phi)(1-Z_j)) (1-Z_i) C_i & i > j \end{cases} \quad [19]$$

94 The entries  $V_{ij}^2$  are given by:

$$95 \quad V_{ij}^2 = \begin{cases} - \left( (2-q)\gamma_1 \frac{(\delta + \alpha_1 q C_1) F_1^2}{P} - T_1 \right) C_1 \\ - 2(\phi - 1) C_1 \sum_{k>1} \alpha_k \psi_{k1} \frac{(qZ_k + (2-q)(1-Z_k)) C_k}{H_k + E_k} & i = j = 1 \\ - ((2-q)\gamma_i F_i - T_i) C_i \\ - 2(\phi - 1) C_i \sum_{k>i} \alpha_k \psi_{ki} \frac{(qZ_k + (2-q)(1-Z_k)) C_k}{H_k + E_k} & i = j \neq 1 \\ -\alpha_j \psi_{ji} \frac{2(q-1)C_j}{H_j + E_j} (\phi Z_i + (2-\phi)(1-Z_i)) C_i & i < j \\ (2-q)\gamma_i \frac{H_i}{(H_i + E_i)^2} \psi_{ij} 2(\phi - 1) C_j (1-Z_i) C_i & i > j \end{cases} \quad [20]$$

96 To derive the expressions for the matrix elements  $V_{ij}^2$  with  $i > j$  I have used the identities

$$97 \quad \frac{dF_i}{dZ_j} = \frac{dF_i}{dE_i} \frac{dE_i}{dZ_j} = \frac{H_i}{(H_i + E_i)^2} \frac{dE_i}{dZ_j} = \frac{H_i}{(H_i + E_i)^2} \psi_{ij} 2(\phi - 1) C_j$$

98 and

$$\begin{aligned}
 \frac{d(F_1(1-Z_1))}{dZ_1} &= \frac{d}{dZ_1} \frac{P(1-Z_1)}{\delta + \alpha_1(qZ_1 + (2-q)(1-Z_1))C_1} \\
 &= -\frac{(\delta + \alpha_1qC_1)P}{(\delta + \alpha_1(qZ_1 + (2-q)(1-Z_1))C_1)^2} \\
 &= -\frac{(\delta + \alpha_1qC_1)F_1^2}{P}
 \end{aligned}$$

102 The entries  $V_{ij}^3$  are given by:

$$V_{ij}^3 = \begin{cases} -\gamma_1 \frac{\alpha_1(qZ_1 + (2-q)(1-Z_1))F_1^2}{P} ((2-q)(1-Z_1)^2 - qZ_1) & i = j = 1 \\ 0 & i = j \neq 1 \\ -\alpha_j \psi_{ji} \frac{(qZ_j + (2-q)(1-Z_j))}{H_j + E_j} 2(\phi-1)(1-Z_i)Z_i & i < j \\ \gamma_i \frac{H_i}{(H_i + E_i)^2} \psi_{ij} (\phi Z_j + (2-\phi)(1-Z_j)) ((2-q)(1-Z_i)^2 - qZ_i) & i > j \end{cases} \quad [21]$$

104 To derive the expressions for the matrix elements  $V_{ij}^3$  with  $i = j = 1$  I have used the identity

$$\begin{aligned}
 \frac{dF_1}{dC_1} &= \frac{d}{dC_1} \frac{P}{\delta + \alpha_1(qZ_1 + (2-q)(1-Z_1))C_1} \\
 &= -\frac{\alpha_1(qZ_1 + (2-q)(1-Z_1))P}{(\delta + \alpha_1(qZ_1 + (2-q)(1-Z_1))C_1)^2} \\
 &= -\frac{\alpha_1(qZ_1 + (2-q)(1-Z_1))F_1^2}{P}
 \end{aligned}$$

108 Finally, the entries  $V_{ij}^4$  are given by:

$$V_{ij}^4 = \begin{cases} -\gamma_1 \frac{2\alpha_1(q-1)C_1F_1^2}{P} ((2-q)(1-Z_1)^2 - qZ_1) \\ \quad -2((2-q)\gamma_1F_1 - T_1)(1-Z_1) - (q\gamma_1F_1 - T_1) \\ \quad -2(\phi-1)(1-2Z_1) \sum_{k>1} \alpha_k \psi_{k1} \frac{(qZ_k + (2-q)(1-Z_k))C_k}{H_k + E_k} & i = j = 1 \\ -2((2-q)\gamma_iF_i - T_i)(1-Z_i) - (q\gamma_iF_i - T_i) \\ \quad -2(\phi-1)(1-2Z_i) \sum_{k>i} \alpha_k \psi_{ki} \frac{(qZ_k + (2-q)(1-Z_k))C_k}{H_k + E_k} & i = j \neq 1 \\ -\alpha_j \psi_{ji} \frac{2(q-1)C_j}{H_j + E_j} 2(\phi-1)(1-Z_i)Z_i & i < j \\ \gamma_i \frac{H_i \psi_{ij} 2(\phi-1)C_j}{(H_i + E_i)^2} ((2-q)(1-Z_i)^2 - qZ_i) & i > j \end{cases} \quad [22]$$

110 The derivation of the expressions for the matrix elements  $V_{ij}^4$  with  $i = j = 1$  is based on the identity

$$\begin{aligned}
 \frac{dF_1}{dZ_1} &= \frac{d}{dZ_1} \frac{P}{\delta + \alpha_1(qZ_1 + (2-q)(1-Z_1))C_1} \\
 &= -\frac{2\alpha_1(q-1)C_1P}{(\delta + \alpha_1(qZ_1 + (2-q)(1-Z_1))C_1)^2} \\
 &= -\frac{2\alpha_1(q-1)C_1F_1^2}{P}
 \end{aligned}$$

114 As explained above, indirect effects occur between species because changes in the total density  $C_j$  and fraction of juveniles  
115  $Z_j$  influence the encounter rate  $E_k$  of a consumer species  $k$ , which in turn affects the predation rate of species  $k$  on species  $i$ .

116 These indirect effects therefore always arise because of the summation terms representing predation mortality in eqs. (13) and  
 117 (14). In the predation rate of species  $k$  only the term  $1/(H_k + E_k)$  depends on the total density  $C_j$  and the fraction of juveniles  
 118  $Z_j$  of species  $j$  and the derivatives of this term with respect to  $C_j$  and  $Z_j$  equal

$$119 \quad -\frac{1}{(H_k + E_k)^2} \psi_{kj} (\phi Z_j + (2 - \phi)(1 - Z_j))$$

120 and

$$121 \quad -\frac{1}{(H_k + E_k)^2} \psi_{kj} 2(\phi - 1) C_j$$

122 respectively. The elements of the matrices  $\mathbf{W}^1$ ,  $\mathbf{W}^2$ ,  $\mathbf{W}^3$  and  $\mathbf{W}^4$  are hence defined as:

$$123 \quad W_{i,j}^1 = (\phi Z_i + (2 - \phi)(1 - Z_i)) C_i (\phi Z_j + (2 - \phi)(1 - Z_j)) \sum_{k>i} \alpha_k \psi_{ki} \psi_{kj} \frac{(qZ_k + (2 - q)(1 - Z_k)) C_k}{(H_k + E_k)^2}$$

$$124 \quad W_{i,j}^2 = (\phi Z_i + (2 - \phi)(1 - Z_i)) C_i 2(\phi - 1) C_j \sum_{k>i} \alpha_k \psi_{ki} \psi_{kj} \frac{(qZ_k + (2 - q)(1 - Z_k)) C_k}{(H_k + E_k)^2}$$

$$125 \quad W_{i,j}^3 = 2(\phi - 1)(1 - Z_i) Z_i (\phi Z_j + (2 - \phi)(1 - Z_j)) \sum_{k>i} \alpha_k \psi_{ki} \psi_{kj} \frac{(qZ_k + (2 - q)(1 - Z_k)) C_k}{(H_k + E_k)^2}$$

$$126 \quad W_{i,j}^4 = 2(\phi - 1)(1 - Z_i) Z_i 2(\phi - 1) C_j \sum_{k>i} \alpha_k \psi_{ki} \psi_{kj} \frac{(qZ_k + (2 - q)(1 - Z_k)) C_k}{(H_k + E_k)^2}$$

127 Note that  $i$  and  $j$  may be equal to each other as changes in the total density of  $C_i$  and the fraction of juveniles  $Z_i$  change the  
 128 predation rate of species  $k$  on species  $i$  through a change in the functional response of species  $k$ , which effect is not captured  
 129 by the matrices  $\mathbf{V}^1$ ,  $\mathbf{V}^2$ ,  $\mathbf{V}^3$  and  $\mathbf{V}^4$ . Furthermore, note that all elements  $W_{i,j}^1$  are positive for species that are exposed to  
 130 predation and equal to 0 only for top predators. Together with the fact that  $V_{i,i}^1 = 0$  for  $i \neq 0$  this implies that the effect of  
 131 species density  $C_i$  on its own rate of change  $dC_i/dt$  is 0 for top predators and positive for all non-basal species experiencing  
 132 predation.

133 All communities resulting from the stage-structured model with asymmetry in feeding and predation between juveniles and  
 134 adults ( $q = 0.7$ ,  $\phi = 1.8$ ) for which the minimum and maximum values of the total species density differed less than  $10^{-6}$  from  
 135 each other for all species were considered stable. All communities for which the minimum and maximum values of total species  
 136 density differed more than  $10^{-6}$  from each other for at least 1 species, were considered unstable (cycling) communities. For  
 137 both stable and unstable communities the average total abundance and fraction of juveniles observed in the simulation were  
 138 used as starting values to numerically solve for the equilibrium state using the package ‘rootSolve’ (1, 2) in R (3). For all  
 139 115 stable communities the equilibrium community state was successfully located and was numerically indistinguishable from  
 140 the average densities and juvenile fractions observed in the numerical simulations. For 147 communities that were considered  
 141 unstable (cycling) the numerical solution procedure also converged to an equilibrium community state with all species present,  
 142 while for 238 unstable communities the numerical solution procedure did not converge to such an equilibrium state.

143 For all communities, for which the equilibrium state was successfully located, the Jacobian matrix  $J$  was evaluated by  
 144 substituting for all species the equilibrium values for the total abundance and fraction of juveniles as well as all general and  
 145 species-specific parameters into the matrices  $\mathbf{V}^1$ ,  $\mathbf{V}^2$ ,  $\mathbf{V}^3$ ,  $\mathbf{V}^4$ ,  $\mathbf{W}^1$ ,  $\mathbf{W}^2$ ,  $\mathbf{W}^3$  and  $\mathbf{W}^4$ . The eigenvalues of the Jacobian matrix  
 146  $\mathbf{J}$  (see Eq. (17)) were subsequently computed numerically using the routine `eigen()` in R (3). These calculations of the Jacobian  
 147 matrix based on the analytical expressions for the matrices  $\mathbf{V}^1$ ,  $\mathbf{V}^2$ ,  $\mathbf{V}^3$ ,  $\mathbf{V}^4$ ,  $\mathbf{W}^1$ ,  $\mathbf{W}^2$ ,  $\mathbf{W}^3$  and  $\mathbf{W}^4$  were verified by also  
 148 computing the Jacobian matrix numerically using central differencing methods applied to the right-hand side of the ODEs (13)  
 149 and (14) for  $dC_i/dt$  and  $dZ_i/dt$ .

150 For both stable and unstable communities the largest real part among the eigenvalues (i.e. the real part of the dominant  
 151 eigenvalue) is shown in Fig. S4. For stable communities this real part was always negative, ranging between  $-0.061$  and  
 152  $-9.8 \cdot 10^{-5}$ . For unstable communities this real part was always positive, ranging between  $1.3 \cdot 10^{-4}$  and  $0.124$ .

153 **Sources of community stability.** For stable communities the effect of dynamic changes in population stage-structure (i.e. changes  
 154 in the juvenile-adult ratio) on the stability of the community equilibrium was evaluated further. The dominant eigenvalues  
 155 computed for these communities were compared with the eigenvalues of the top-left submatrix of  $J$ , that is the  $m \times m$  matrix  
 156  $\partial \mathbf{K} / \partial \mathbf{C}$  of these communities. The latter matrix determines the stability of the species-density subsystem on its own with the  
 157 juvenile fraction of each species equal to its equilibrium value. More specifically, this reduced model of the species-density  
 158 subsystem on its own is described by the same dynamic equations for the total species densities as in the full model (Eq. (13)),  
 159 but with the fraction of juveniles  $Z_i$  in the populations taken constant over time and equal to the fraction of juveniles of the

160 species at equilibrium  $\tilde{Z}_i$ :

$$\begin{aligned}
 \frac{dC_i}{dt} &= ((2-q)\gamma_i F_i - T_i)(1 - \tilde{Z}_i)C_i - \mu_i C_i \\
 &\quad - \sum_{k>i} \alpha_k \psi_{ki} \frac{(\phi \tilde{Z}_i + (2-\phi)(1 - \tilde{Z}_i)) C_i}{H_k + E_k} (q \tilde{Z}_k + (2-q)(1 - \tilde{Z}_k)) C_k
 \end{aligned} \tag{23}$$

163 Comparing the eigenvalues of this reduced model with the eigenvalues of the full model, in which the juvenile fraction in the  
 164 population  $Z_i$  is dynamic and changes at the same time scale as the total species density, reveals the impact of dynamic changes  
 165 in the population structure of the species on the stability of the community equilibrium. The eigenvalues of the reduced model  
 166 can be computed from its Jacobian matrix which equals the matrix  $\partial \mathbf{K} / \partial \mathbf{C} = \mathbf{V}^1 + \mathbf{W}^1$ . This matrix corresponds to the  
 167 community matrix with elements  $\partial(dC_i/dt)/\partial C_j$  that captures the per-capita effect of the species in the community on each  
 168 other's growth rate and determines stability in community models without population structure.

169 To further assess the differences between constant and a dynamic juvenile fraction in the population, for all stable communities  
 170 resulting from the stage-structured model with asymmetry in feeding and predation between juveniles and adults ( $q = 0.7$ ,  
 171  $\phi = 1.8$ ) community dynamics were computed starting from the equilibrium community state using the reduced model including  
 172 the differential equations  $dC_i/dt$  for the species-density subsystem only (Eq. (23)), with the juvenile fraction  $Z_i$  in each of  
 173 the populations taken equal to its equilibrium value inferred from the stable community state (see Fig. 4C, top-left panel,  
 174 in the main text and Fig. S6). Similarly, community dynamics were computed with an age-structured analogue of the full  
 175 model. This age-structured model includes differential equations  $dC_i/dt$  for the species-density subsystem and  $dZ_i/dt$  for the  
 176 species-structure subsystem, but substitutes the juvenile maturation rate  $m_i(F_i)$  for each of the species in the community with  
 177 a constant value. This constant value is equal to the maturation rate that juveniles of the species experience in the community  
 178 equilibrium and is indicated with  $\tilde{m}_i$ . Dynamics are then described by the equations:

$$\begin{aligned}
 \frac{dC_i}{dt} &= b_i(F_i)(1 - Z_i)C_i - \mu_i C_i \\
 &\quad - (\phi Z_i + (2-\phi)(1 - Z_i)) C_i \sum_{k>i} \alpha_k \psi_{ki} \frac{(q Z_k + (2-q)(1 - Z_k)) C_k}{H_k + E_k}
 \end{aligned} \tag{24}$$

$$\begin{aligned}
 \frac{dZ_i}{dt} &= b_i(F_i)(1 - Z_i)^2 - \tilde{m}_i Z_i \\
 &\quad - 2(\phi - 1)(1 - Z_i) Z_i \sum_{k>i} \alpha_k \psi_{ki} \frac{(q Z_k + (2-q)(1 - Z_k)) C_k}{H_k + E_k}
 \end{aligned} \tag{25}$$

183 The simulations with this age-structured analogue were also started from the equilibrium community state (see Fig. 4C, top-right  
 184 panel, in the main text and Fig. S6). For comparison, community dynamics were also computed with the full model including  
 185 the differential equations  $dC_i/dt$  for the species-density subsystem (Eq. (3)) and  $dZ_i/dt$  for the species-structure subsystem  
 186 (Eq. (4)) starting from a community state in which the initial density of each species was exactly 50% of its equilibrium value  
 187 inferred from the stable community state (see Fig. 4C, bottom panel in the main text and Fig. S6).

188 **Extent of self-regulation.** For stable communities the extent of self-regulation of species is assessed with the diagonal elements  
 189 of the community matrix, the  $m \times m$  matrix  $\partial \mathbf{K} / \partial \mathbf{C}$  (Eq. (17)), which measures the positive or negative effect of the total  
 190 species abundance  $C_i$  on its own rate of change  $dC_i/dt$  (Fig. S5).

## 191 Stage-structured biomass model of species dynamics

192 To check the robustness of the results obtained with the stage-structured model in terms of juvenile and adult numerical  
 193 densities, numerical simulations of community dynamics were also carried out, using a stage-structured biomass model for  
 194 species dynamics (4). More specifically, each species was represented by 3 life history stages, referred to as juveniles, subadults  
 195 and adults. Such a stage-structured biomass model (4) constitutes an approximation to a size-structured population model  
 196 that accounts for a complete size distribution of individuals between their size at birth and size at maturation, in which the  
 197 rates of feeding, metabolic maintenance, somatic growth, and reproduction all scale linearly with individual body size (5).  
 198 Juvenile and subadult individuals are assumed to use their net-energy production (the difference between assimilation and  
 199 metabolic maintenance rate) for somatic growth, whereas adults are assumed not to grow and use their net-energy production  
 200 for reproduction. Dynamics are in terms of juvenile, subadult and adult biomass densities, indicated with  $J_i$ ,  $S_i$  and  $A_i$ ,  
 201 respectively.

202 In the absence of predation the life history processes in the stage-structured biomass model are described by the following

203 mass-specific rate functions:

204 Juvenile somatic growth  $g_i^J(F_i) = \max((2 - q)\gamma_i F_i - T_i, 0)$  [26]

205 Subadult somatic growth  $g_i^S(F_i) = \max(q\gamma_i F_i - T_i, 0)$  [27]

206 Adult reproduction  $b_i(F_i) = \max((2 - q)\gamma_i F_i - T_i, 0)$  [28]

207 Juvenile mortality  $d_i^J(F_i) = \mu_i - \min((2 - q)\gamma_i F_i - T_i, 0)$  [29]

208 Subadult mortality  $d_i^S(F_i) = \mu_i - \min(q\gamma_i F_i - T_i, 0)$  [30]

209 Adult mortality  $d_i^A(F_i) = \mu_i - \min((2 - q)\gamma_i F_i - T_i, 0)$  [31]

210 Juvenile maturation  $m_i^J(F_i) = \begin{cases} \frac{g_i^J(F_i) - D_i^J}{1 - z^{1 - D_i^J/g_i^J(F_i)}} & \text{if } g_i^J(F_i) > 0 \\ 0 & \text{otherwise} \end{cases}$  [32]

211 Subadult maturation  $m_i^S(F_i) = \begin{cases} \frac{g_i^S(F_i) - D_i^S}{1 - z^{1 - D_i^S/g_i^S(F_i)}} & \text{if } g_i^S(F_i) > 0 \\ 0 & \text{otherwise} \end{cases}$  [33]

212 In these equations  $F_i$  represents the functional response of species  $i$ , which for the basal species equals:

213 
$$F_1 = \frac{P}{\delta + \alpha_1 ((2 - q) J_1 + q S_1 + (2 - q) A_1)}$$
 [34]

214 The parameter  $q$  in this expression determines the asymmetry in feeding capacity between juveniles, subadults and adults (for  
215 the purpose of this study taken the same for all species). Non-basal species forage following a type II functional response:

216 
$$F_i = \frac{E_i}{H_i + E_i}$$
 [35]

217 in which  $E_i$  represents the encounter rate of non-basal species  $i$  with prey biomass:

218 
$$E_i = \sum_{k < i} \psi_{ik} (\phi J_k + (2 - \phi) S_k + (2 - \phi) A_k)$$
 [36]

219 The parameter  $\phi$  represents the bias of the consumer species toward feeding on juvenile as opposed to subadult and adult prey  
220 (for the purpose of this study taken the same for all species). Notice that all species are ordered according to their body size  
221 and hence species  $i$  can only feed on species with an index  $k < i$ .

222 The parameter  $T_i$  in the life history functions (26)-(33) represents the (mass-specific) loss rate through metabolic maintenance  
223 requirements, while the parameter  $\mu_i$  represents the background mortality. The parameter  $\gamma_i$  determines the maximum  
224 assimilation rate per unit biomass, while the parameter  $z$  equals the ratio between the body size at entering and leaving each  
225 of the immature stages (the juvenile and subadult stage). The parameters  $\gamma_i$ ,  $q$  and  $T_i$  also determine the minimum food  
226 availability that is needed by juveniles, subadults and adults to just keep itself alive without producing any offspring and  
227 without maturing.

228  $D_i^J$  and  $D_i^S$  indicate the total mortality rate experienced by juvenile and subadult individuals, respectively, which in the  
229 absence of predation equals  $\mu_i$ , but in the presence of predation also includes the predation mortality (see below; note that  
230  $D_i^J$  and  $D_i^S$  do not include starvation mortality as starvation mortality only occurs when  $g_i^J(F_i) = 0$  or  $g_i^S(F_i) = 0$ , in which  
231 case  $m_i^J(F_i) = 0$  and  $m_i^S(F_i) = 0$ , respectively). Equations (28), (26), (27), (32) and (33) express that adult reproduction,  
232 juvenile and subadult growth in body size and juvenile and subadult maturation come to a halt under starvation conditions,  
233 which for juveniles, subadults and adults occur when  $(2 - q)\gamma_i F_i < T_i$ ,  $q\gamma_i F_i < T_i$  and  $(2 - q)\gamma_i F_i < T_i$ , respectively. Under  
234 these starvation conditions juveniles, subadults and adults experience increased mortality (Eqs. (29), (30) and (31)). The  
235 mass-specific juvenile and subadult maturation rates depends on both juvenile and subadult growth rate in body size as well  
236 as total juvenile and subadult mortality,  $D_i^J$  and  $D_i^S$ , respectively. The functional form of the maturation rates  $m_i^J(F_i)$  and  
237  $m_i^S(F_i)$  is chosen such that any equilibrium state predicted by the stage-structured biomass model corresponds uniquely to  
238 an equilibrium state of a structured model that accounts for a complete size distribution of individuals between their size at  
239 birth and size at maturation, in which the rates of feeding, metabolic maintenance, somatic growth, and reproduction all scale  
240 linearly with individual body size (5).

241 A representation of each species by 3 life history stages with the smallest juveniles most vulnerable to predation mortality  
242 and the maturation of the larger immature individuals limited most by food availability was chosen because the dynamics of  
243 such a 3-stage biomass model has been found to closely resemble the dynamics of population models with a complete size  
244 distribution that are based on a dynamic energy budget model for the individual energetics (6). Similar results as presented in  
245 Fig. S7, S8 and S9 have, however, also been obtained using a stage-structured biomass model with only a single juvenile and  
246 adult life history stage to describe species dynamics.



247 The dynamics of the juvenile, subadult and adult biomass densities of all species in the community are now described by  
 248 the following set of ordinary differential equations (ODEs):

$$249 \frac{dJ_i}{dt} = b_i(F_i)A_i + g_i^J(F_i)J_i - m_i^J(F_i)J_i - d_i^J(F_i)J_i - \phi J_i \sum_{k>i} \alpha_k \psi_{ki} \frac{(2-q)J_k + qS_k + (2-q)A_k}{H_k + E_k} \quad [37]$$

$$250 \frac{dS_i}{dt} = m_i^J(F_i)J_i + g_i^S(F_i)S_i - m_i^S(F_i)S_i - d_i^S(F_i)S_i - (2-\phi)S_i \sum_{k>i} \alpha_k \psi_{ki} \frac{(2-q)J_k + qS_k + (2-q)A_k}{H_k + E_k} \quad [38]$$

$$251 \frac{dA_i}{dt} = m_i^S(F_i)S_i - d_i^A(F_i)A_i - (2-\phi)A_i \sum_{k>i} \alpha_k \psi_{ki} \frac{(2-q)J_k + qS_k + (2-q)A_k}{H_k + E_k} \quad [39]$$

252 In these equations  $E_k$  and  $H_k$  represent the encounter rate with prey and the half-saturation density in the functional response  
 253 of species  $k$ , respectively (Eq. (36)), while the parameters  $q$  and  $\phi$  represent the asymmetry in foraging rate and predation risk,  
 254 respectively, between juvenile, subadult and adult individuals. The default values for these parameters equal 1, implying that  
 255 all 3 stages have identical life history rates ( $q = 1$ ) and that consumers feed indiscriminately on juveniles, subadults and adults  
 256 of their prey species ( $\phi = 1$ ). Finally, the parameter  $\alpha_k$  represents the maximum (mass-specific) foraging rate of consumer  
 257 species  $k$ .

258 Given the above equations, the total juvenile mortality rate, on which the maturation rate (Eq. (32)) of juvenile into  
 259 subadult biomass depends, is the sum of background (but not starvation) mortality and predation mortality:

$$260 D_i^J = \mu_i + \phi \sum_{k>i} \alpha_k \psi_{ki} \frac{(2-q)J_k + qS_k + (2-q)A_k}{H_k + E_k} \quad [40]$$

261 Starvation mortality is excluded from  $D_i^J$  because the maturation rate equals 0 under starvation conditions. Analogously, the  
 262 total subadult mortality rate, on which the maturation rate (Eq. (33)) of subadult into adult biomass depends, is the sum of  
 263 background (but not starvation) mortality and predation mortality:

$$264 D_i^S = \mu_i + (2-\phi) \sum_{k>i} \alpha_k \psi_{ki} \frac{(2-q)J_k + qS_k + (2-q)A_k}{H_k + E_k} \quad [41]$$

265 **Model parameterisation and numerical simulation details.** Parameterisation of the stage-structured biomass model follows the  
 266 same procedure as the stage-structured model in terms of juvenile and adult abundance (see Materials and Methods). In short,  
 267 half-saturation prey densities  $H_i$  for non-basal species are sampled from a uniform distribution on the interval  $[0.5, 2.5]$ . The  
 268 ratio between the smallest and the largest body size in each of the two immature life stages,  $z$ , that occurs in the maturation  
 269 rates of the stage-structured biomass model (Eq. (32)) and (Eq. (33)), is for all species taken the same and equal to  $z = 0.1$ .  
 270 Individuals are hence assumed to grow 2 orders of magnitude in body size between birth and maturation. The parameters  $\alpha_i$ ,  
 271  $\gamma_i$ ,  $T_i$  and  $\mu_i$  all represent (mass-specific) rates and are assumed to scale with  $w_i^{-0.25}$  following the equations:

$$272 \alpha_i = \alpha_0 \left(1 + 2\sigma_\alpha \left(x_{i1} - \frac{1}{2}\right)\right) w_i^{-0.25} \quad [42]$$

$$273 \gamma_i = \gamma_0 \left(1 + 2\sigma_\gamma \left(x_{i2} - \frac{1}{2}\right)\right) w_i^{-0.25} \quad [43]$$

$$274 T_i = T_0 \left(1 + 2\sigma_T \left(x_{i3} - \frac{1}{2}\right)\right) w_i^{-0.25} \quad [44]$$

$$275 \mu_i = \mu_0 \left(1 + 2\sigma_\mu \left(x_{i4} - \frac{1}{2}\right)\right) w_i^{-0.25} \quad [45]$$

276 The default mean values of the species-specific parameters equal  $\alpha_0 = 1.0$ ,  $\gamma_0 = 0.6$ ,  $T_0 = 0.1$  and  $\mu_0 = 0.015$  (6), while the  
 277 species-specific parameters  $\alpha_i$ ,  $\gamma_i$ ,  $T_i$  and  $\mu_i$  are randomly selected from a Bates distribution of degree 3 around these mean  
 278 values. A Bates distribution is the continuous probability distribution of the mean,  $X$ , of 3 independent uniformly distributed  
 279 random variables on the unit interval. Random values from this distribution range between 0 and 1 with mean value of 1/2  
 280 and are easily generated by taking the mean of 3 independent samplings from a uniform distribution on the unit interval  $[0, 1]$ .  
 281 The quantities  $x_{ij}$  are independent realisations of the random variable  $X$ , while  $\sigma_\alpha$ ,  $\sigma_\gamma$ ,  $\sigma_T$  and  $\sigma_\mu$  represent the one-sided,  
 282 relative width of the distributions of the species-specific parameters  $\alpha_i$ ,  $\gamma_i$ ,  $T_i$  and  $\mu_i$ , respectively, around the mean values  
 283  $\alpha_0 = 1.0$ ,  $\gamma_0 = 0.6$ ,  $T_0 = 0.1$  and  $\mu_0 = 0.015$ . Default values for these relative widths equal 0.1, such that all species-specific  
 284 parameters  $\alpha_i$ ,  $\gamma_i$ ,  $T_i$  and  $\mu_i$  range between 0.9 and 1.1 times their default mean value and follow hump-shaped distributions  
 285 within these ranges. The productivity  $P$  and turn-over rate  $\delta$  of the exclusive resource of the basal species are taken equal  
 286 to 60 and 2.0, respectively, in all computations. The two remaining parameters, the foraging asymmetry parameter  $q$  and  
 287 the predation asymmetry parameter  $\phi$ , in the model are varied between the different computations to assess their effect on  
 288 community dynamics.

289 As described in the Materials and Methods section food webs are generated by selecting  $N = 500$  random niche values  $n_i$   
 290 uniformly from the interval  $[0, 1]$  and associated with species body mass following  $w_i = (w_{max})^{n_i} (w_{min})^{(1-n_i)}$ . Subsequently,  
 291 the network of feeding interactions between these  $N = 500$  species is constructed by generating for each non-basal species  
 292 the midpoint of its feeding niche  $c_i$  following the procedure and default values for the mean prey-predator body mass ratio

293 described in the Materials and Methods and Fig. S10. Numerical integrations of the food web with  $N = 500$  species are  
294 carried out using an adaptive Runge-Kutta (Cash-Karp) method implemented in C. Relative and absolute tolerances during  
295 the integration equal  $1.0 \cdot 10^{-7}$  and  $1.0 \cdot 10^{-13}$ , respectively. During the first  $10^4$  time units no species are removed from the  
296 community, even if they attain very low density. For  $t > 10^4$  each species, whose total biomass density  $J_i + S_i + A_i$  drops  
297 below  $10^{-8}$ , is removed from the community. This persistence threshold ensures that the product of the relative tolerance  
298 ( $10^{-7}$ ) and the lowest species density ( $10^{-8}$ ) is larger than the machine precision (equal to  $1.11 \cdot 10^{-16}$  according to the IEEE  
299 754-2008 standard in case of double precision). During numerical computations mean and variance as well as the maximum  
300 and minimum value of the total species biomass  $J_i + S_i + A_i$  are continuously monitored for all species. The values of these  
301 measured statistics are reset whenever the community structure changes as one or more species in the community go extinct.  
302 Numerical integrations are halted whenever the community structure has not changed for  $10^6$  time units and no change has  
303 occurred from one time unit to the next in the values of these statistics (mean, minimum, maximum and variance of total  
304 species density) for all species in the community.

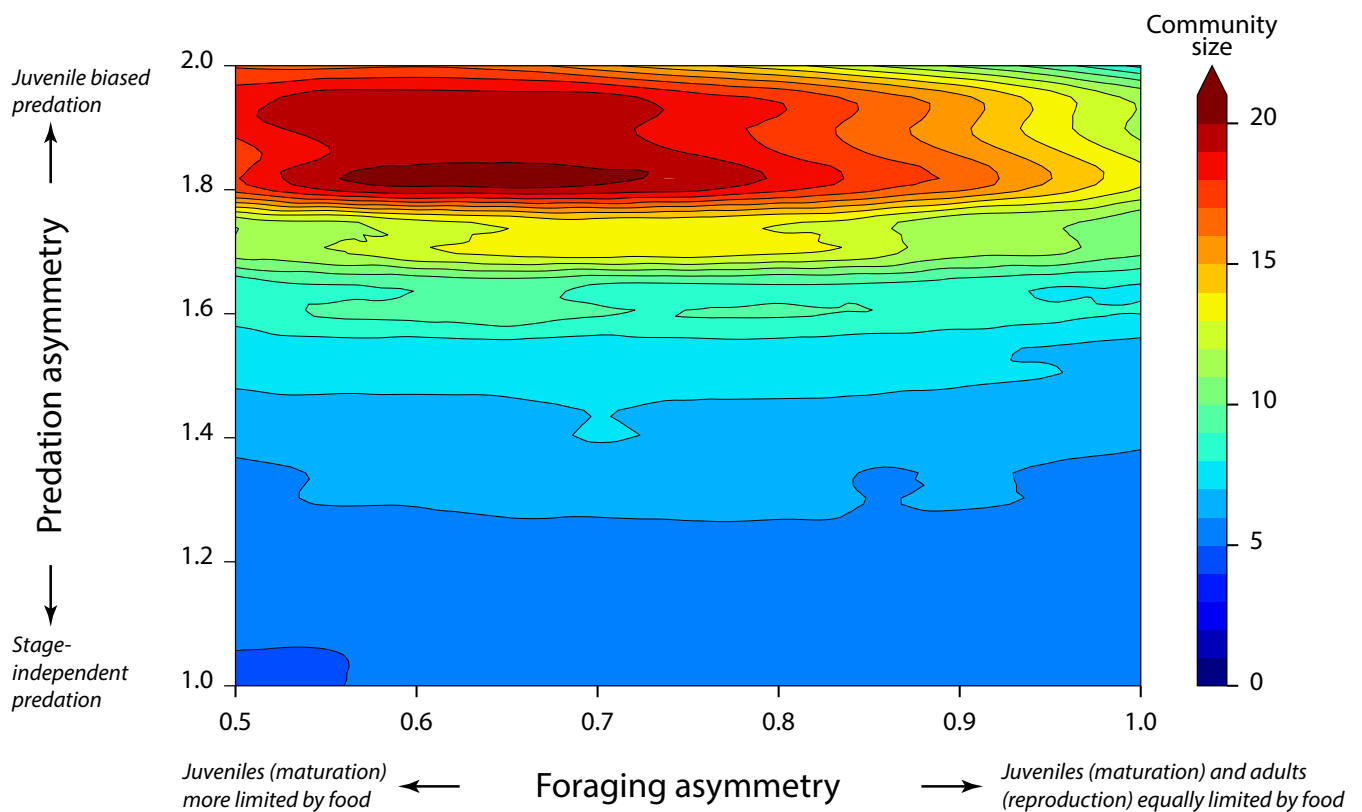

**Fig. S1. Juvenile-adult asymmetry increases community diversity** – Mean community size (non-basal species only) of 500 replicate food web simulations with juvenile-adult stage-structure for different values of foraging ( $q$ ) and predation ( $\phi$ ) asymmetry between juveniles and adults. Larger communities result when predation is stronger on juveniles than on adults and maturation is more limited by food availability than reproduction.

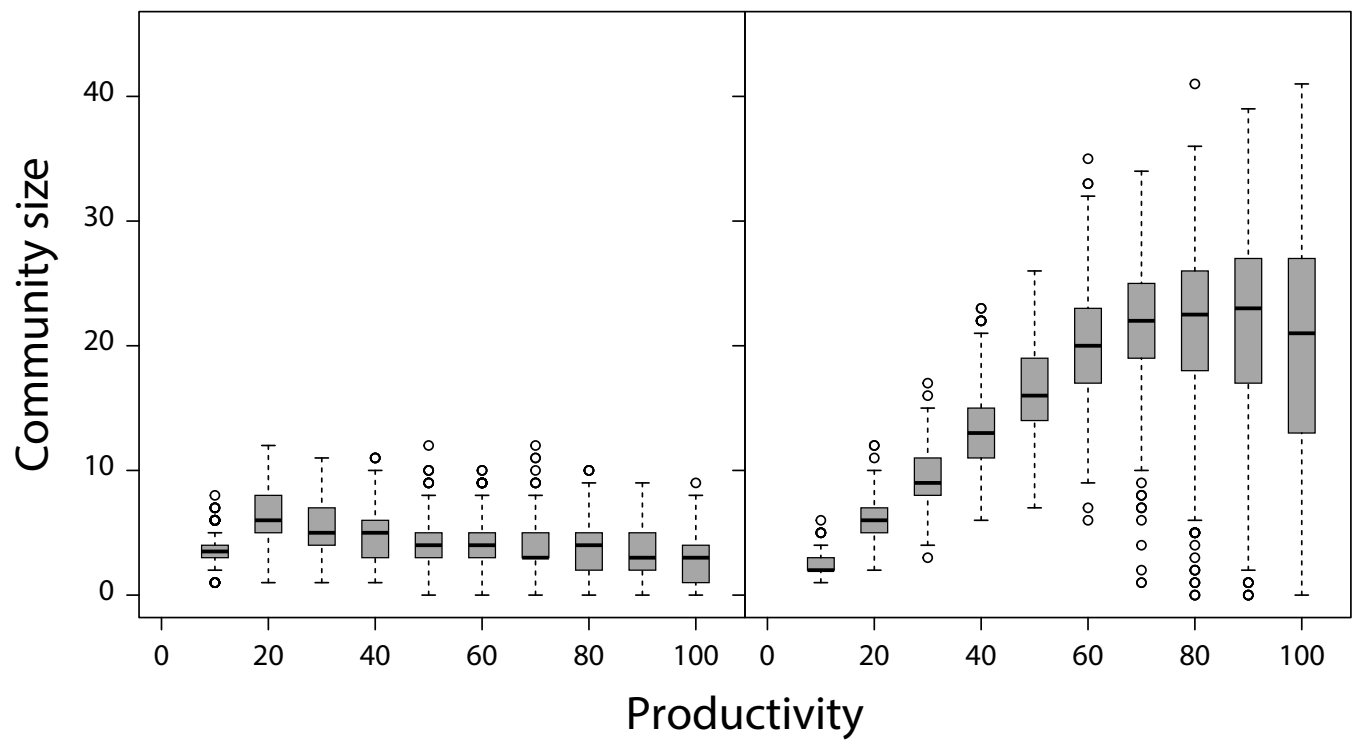

**Fig. S2. Juvenile-adult asymmetry increases community diversity at all productivities** – Boxplot of community sizes at different levels of system productivity  $P$  resulting from 500 replicate food web simulations without (*left*) and with stage-structure and foraging and predation asymmetry between juveniles and adults (*right*;  $q = 0.7$ ,  $\phi = 1.8$ , see Materials and Methods).

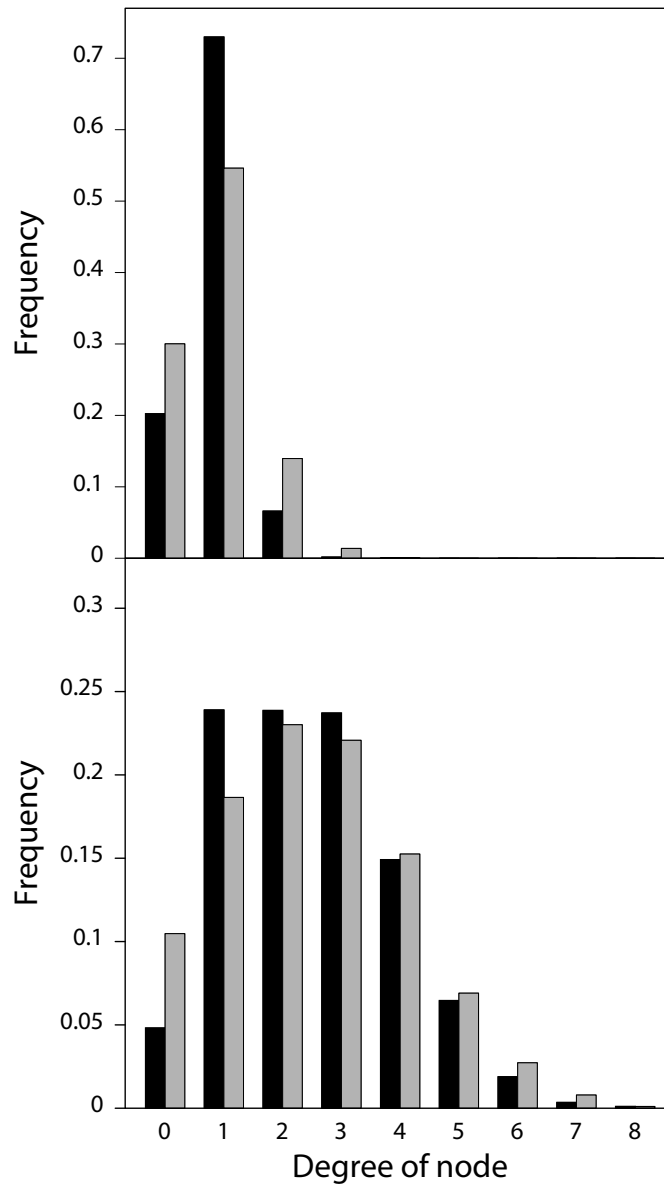

**Fig. S3. Juvenile-adult asymmetry increases food web connectivity** – Number of prey species (black bars; incoming network node links) and predators (grey bars; outgoing network node links) for all species in food webs resulting from 500 replicate simulations without (top panel) and with stage-structure and foraging and predation asymmetry between juveniles and adults (bottom panel;  $q = 0.7$ ,  $\phi = 1.8$ ).

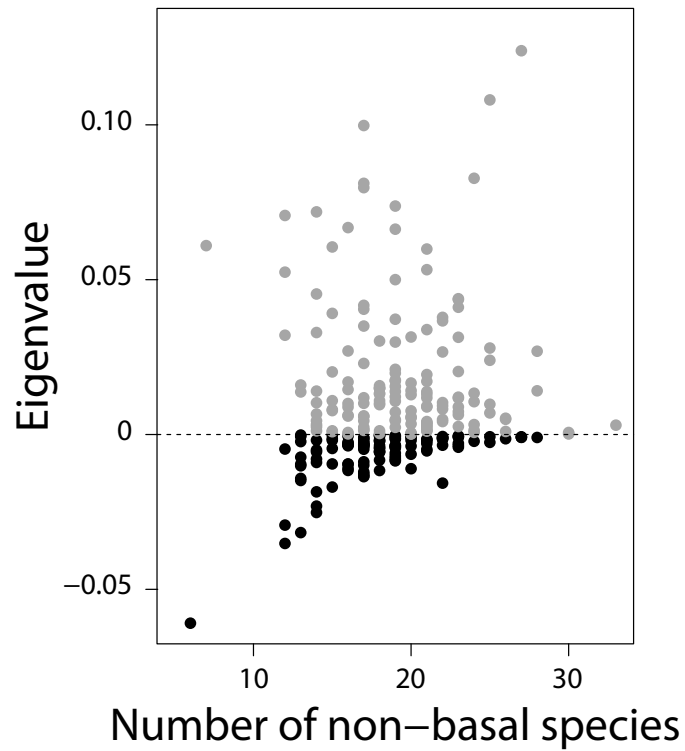

**Fig. S4. Eigenvalues of the Jacobian matrix with largest real part determining community stability** – Real part of the dominant (right-most) eigenvalue of the Jacobian matrix determining community stability as a function of community size for all stable communities (black dots) and all unstable communities for which the equilibrium could be solved for numerically (grey symbols) for the stage-structured model in case of foraging and predation asymmetry between juveniles and adults ( $q = 0.7$ ,  $\phi = 1.8$ ).

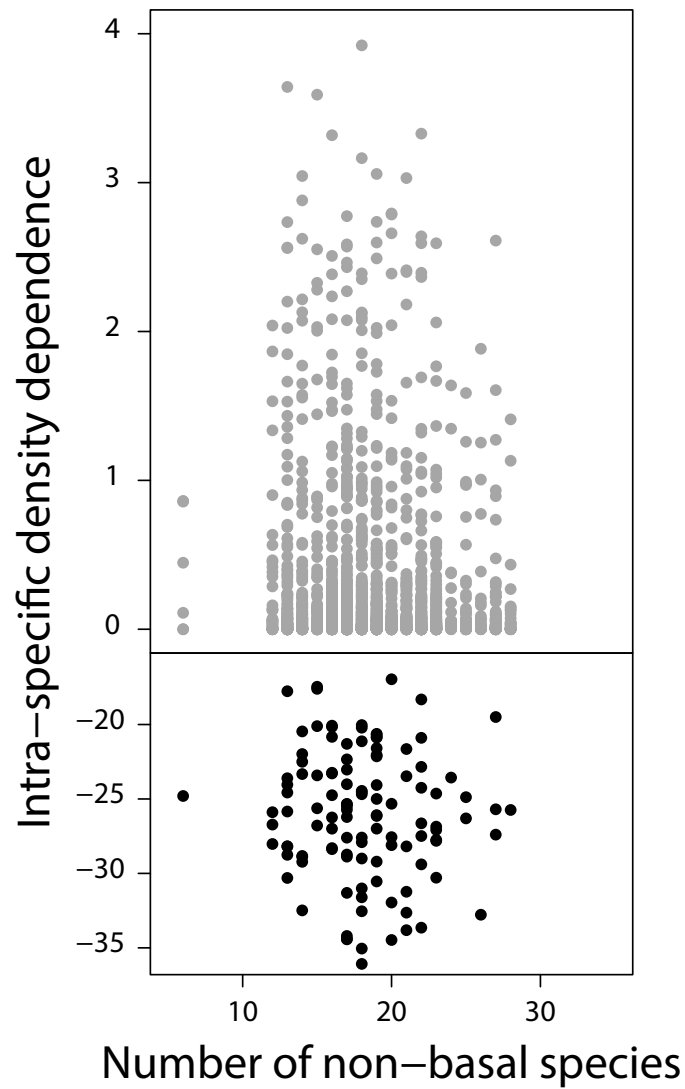

**Fig. S5. Juvenile-adult asymmetry stabilises community dynamics without self-regulation** – Strength of intra-specific density dependence for basal (*bottom*) and all non-basal species (*top*) in stable communities resulting from food web simulations with the stage-structured model and foraging and predation asymmetry between juveniles and adults ( $q = 0.7$ ,  $\phi = 1.8$ ). Intra-specific density dependence is assessed with the diagonal elements of the community matrix, which measures for basal and non-basal species the negative and positive effect, respectively, of total species abundance on its own rate of change (see Materials and Methods).

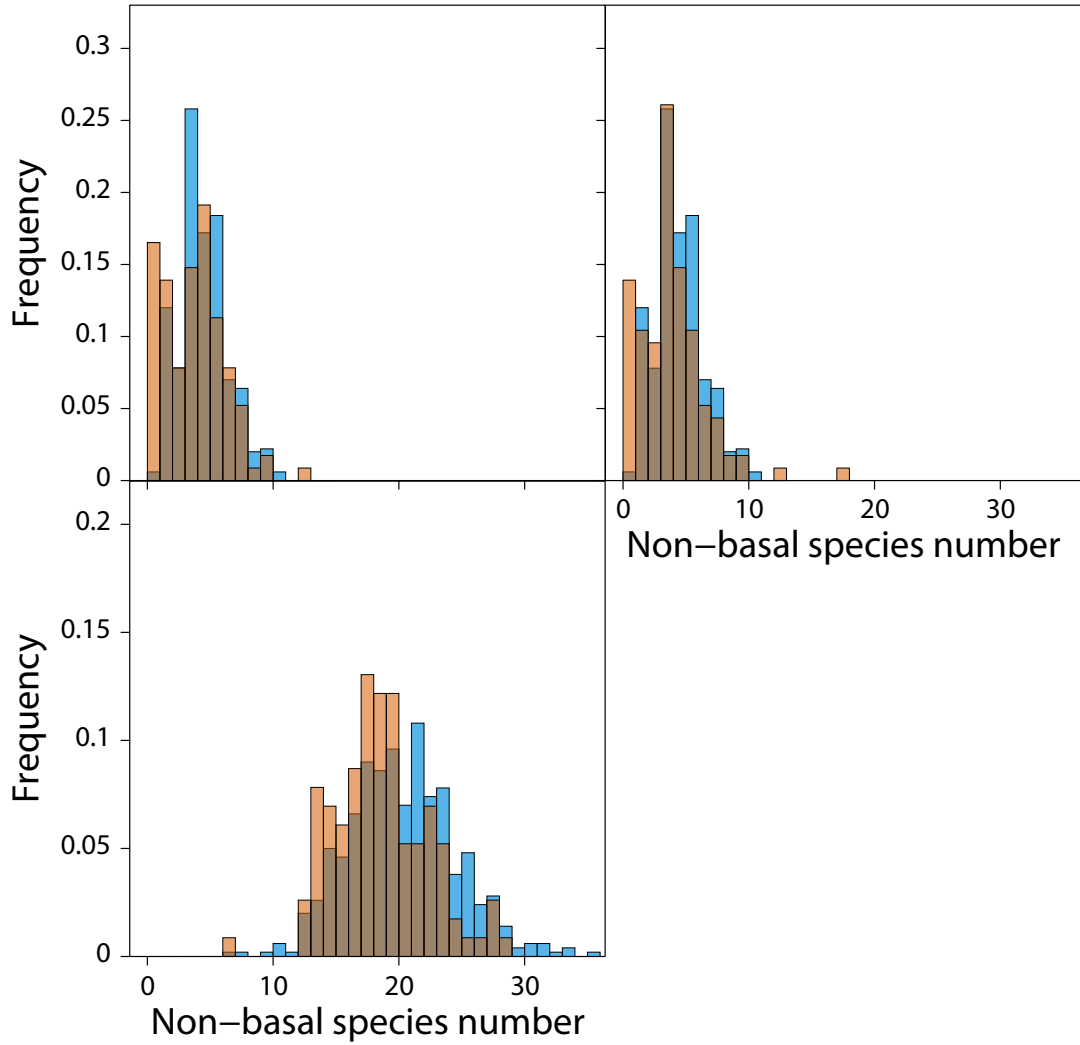

**Fig. S6. Dynamic juvenile-adult ratio enforces complex community stability** – Frequency distribution of community sizes (non-basal species only; red bars) resulting from simulations of dynamics for all stable communities generated by the stage-structured model in case of foraging and predation asymmetry between juveniles and adults ( $q = 0.7$ ,  $\phi = 1.8$ ) with different model variants (see Materials and Methods and section *Sources of community stability* above). Top-left panel shows results of the species-density subsystem on its own with the juvenile-adult ratio for each species constant in time and equal to its equilibrium value when initial species densities are identical to their equilibrium values. Top-right panel shows results of the coupled species-density and species-structure subsystem with the juvenile maturation rate for each species constant in time and equal to its equilibrium value when initial species densities are identical to their equilibrium values (These results represent dynamics of an analogous age-structured model). Bottom panel shows results of the coupled species-density and species-structure subsystem when initial densities for each species are reduced to 50% of their equilibrium densities. For reference, top and bottom panels also show the frequency distribution of community sizes (non-basal species only; blue bars) resulting from 500 replicate food web simulations without and with stage-structure and foraging and predation asymmetry between juveniles and adults, respectively, that are also presented in Figure 2 in the main text.



**A**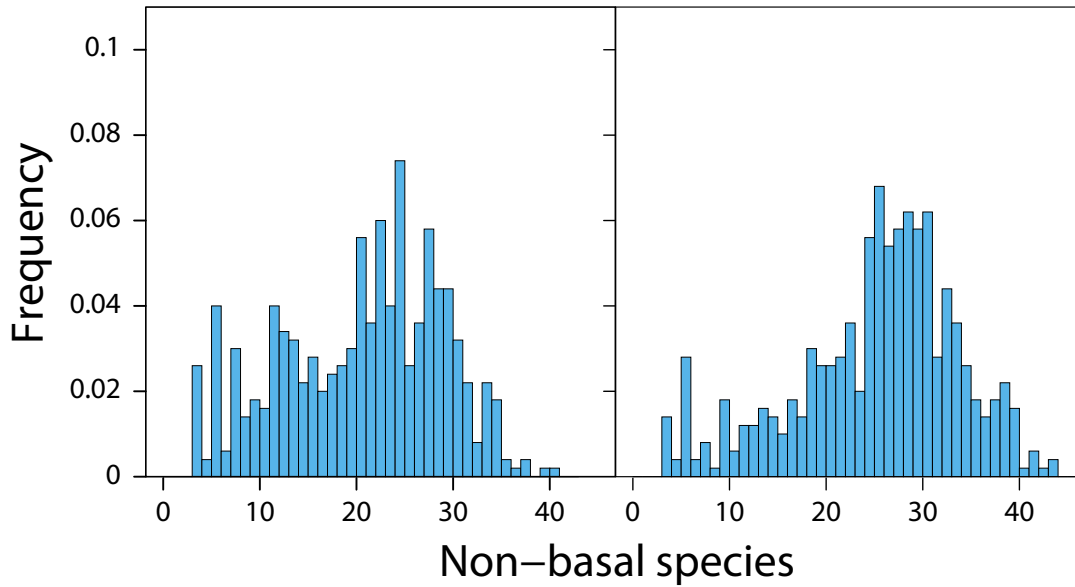**B**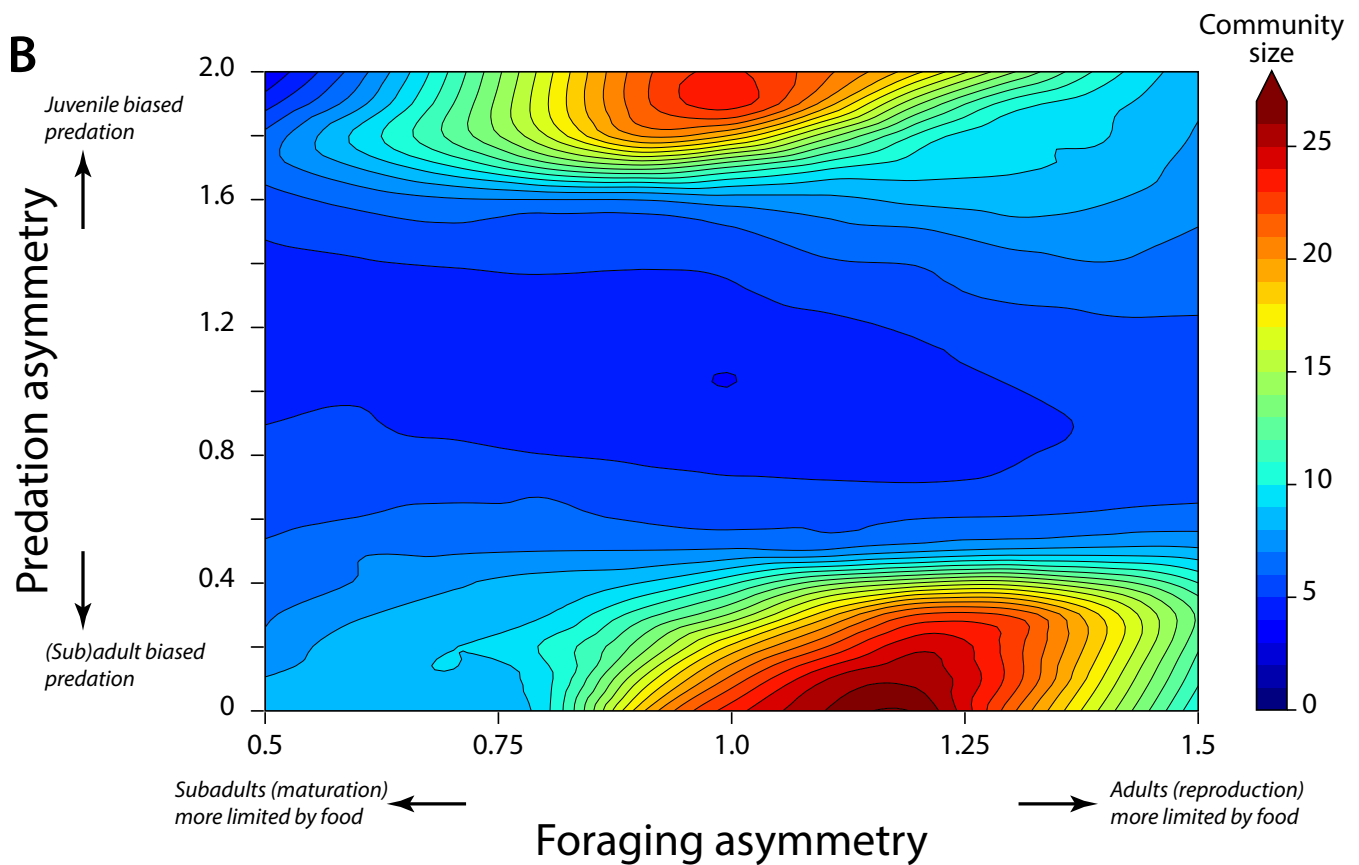

**Fig. S7. Juvenile-adult asymmetry in biomass dynamics increases community diversity** – *A*: Frequency distribution of community sizes (non-basal species only) resulting from 500 replicate food web simulations using the 3-stage biomass model including juveniles, subadults and adults (see section *Stage-structured biomass model of species dynamics* above) when juveniles are most vulnerable to predation and subadults are limited most by food availability (left panel;  $q = 0.9$ ,  $\phi = 1.8$ ) and when subadults and adults are more vulnerable to predation and small juveniles and adults are limited most by food availability (right panel;  $q = 1.2$ ,  $\phi = 0.2$ ). *B*: Mean community size (non-basal species only) of 500 replicate food web simulations using the 3-stage biomass model including juveniles, subadults and adults for different values of foraging ( $q$ ) and predation ( $\phi$ ) asymmetry.

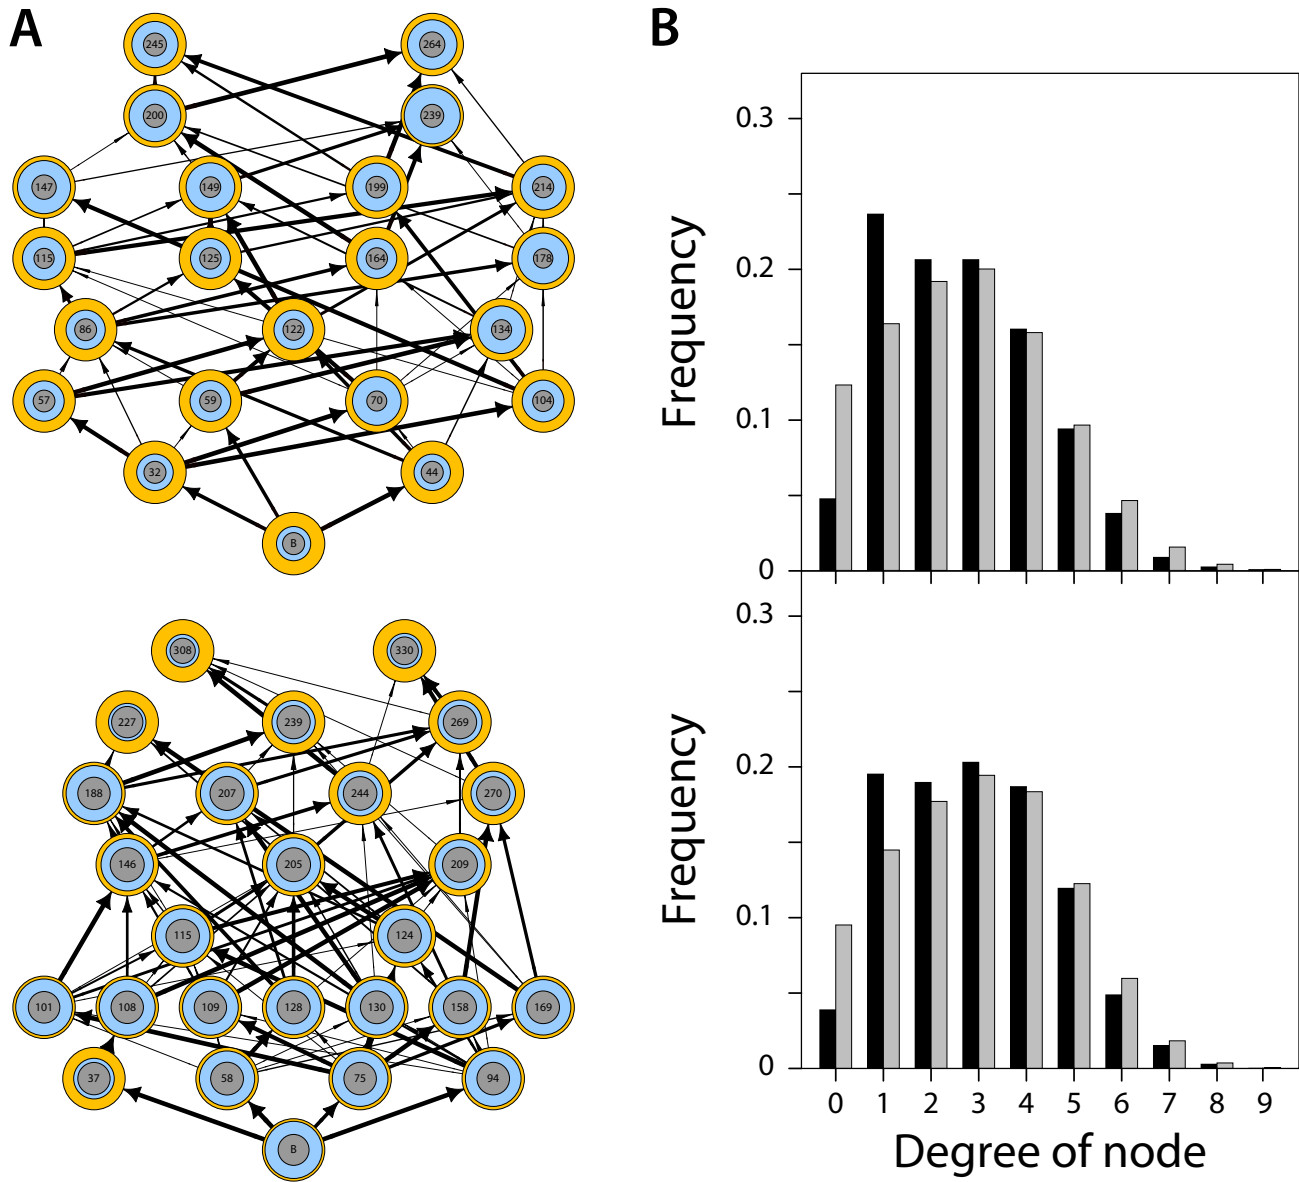

**Fig. S8. Juvenile-adult asymmetry in biomass dynamics increases food web complexity** – A: Examples of food webs resulting from simulations using the 3-stage biomass model including juveniles, subadults and adults (see *Stage-structured biomass model of species dynamics* above) when juveniles are more vulnerable to predation and subadults are limited most by food availability (top panel;  $q = 0.9$ ,  $\phi = 1.8$ ) and when subadults and adults are more vulnerable to predation and small juveniles and adults are limited most by food availability (bottom panel;  $q = 1.2$ ,  $\phi = 0.2$ ). Vertical position indicates trophic level. Inner circles indicate the biomass fraction of juveniles (grey) and total immatures (blue) in the population. Arrow widths indicate the relative feeding preference ( $\psi_{ik}$ , see Materials and Methods) of consumers for a particular prey species. B: Number of prey species (black bars; incoming network node links) and predators (grey bars; outgoing network node links) for all species in food webs resulting from 500 replicate simulations using the 3-stage biomass model including juveniles, subadults and adults when juveniles are more vulnerable to predation and subadults are limited most by food availability (top panel;  $q = 0.9$ ,  $\phi = 1.8$ ) and when subadults and adults are more vulnerable to predation and subadults are limited most by food availability (bottom panel;  $q = 1.2$ ,  $\phi = 0.2$ ).

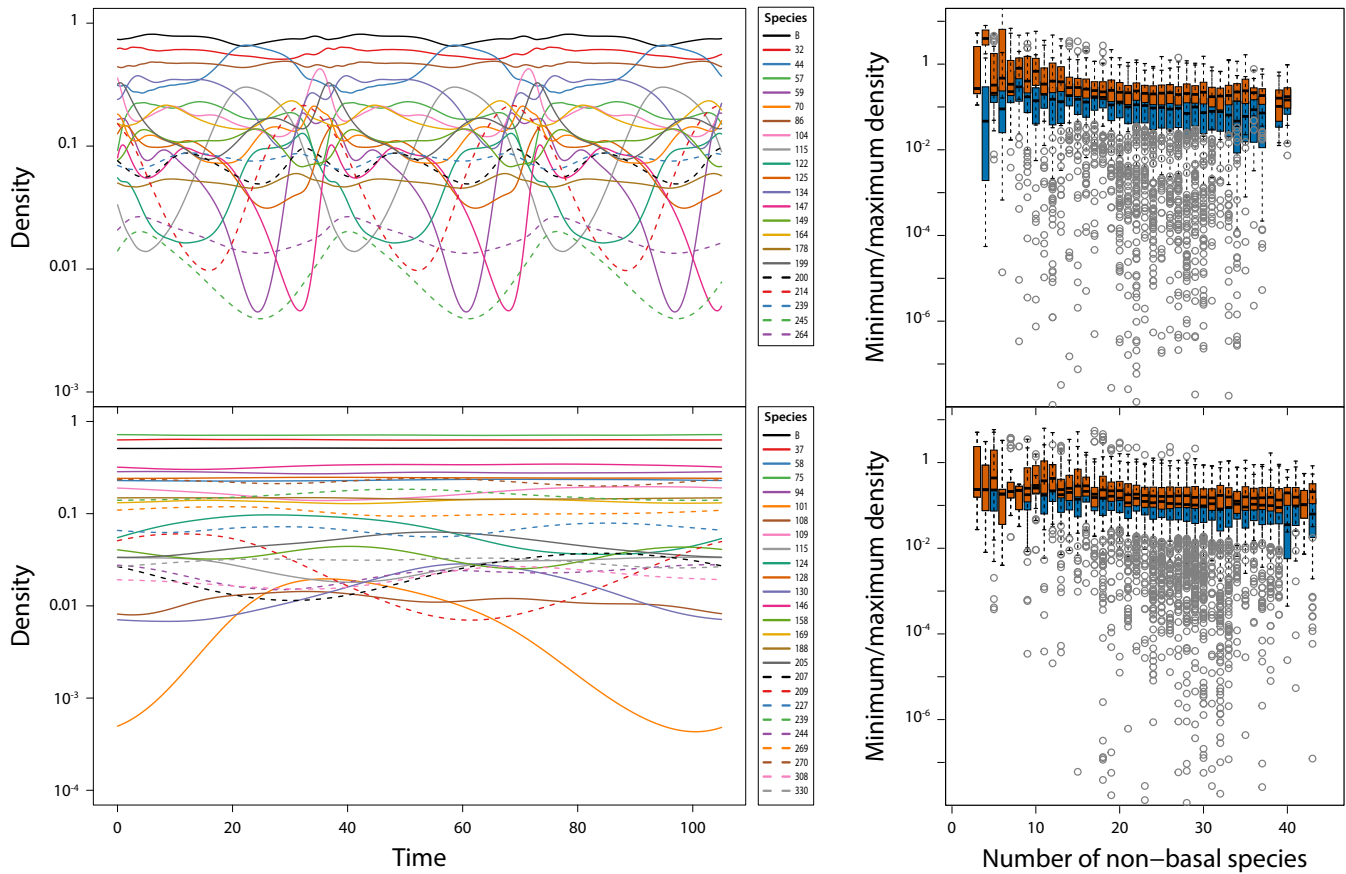

**Fig. S9. Juvenile-adult asymmetry in biomass dynamics stabilises community dynamics** – *A*: Examples of total biomass dynamics of all species in food web simulations using the 3-stage biomass model including juveniles, subadults and adults (see *Stage-structured biomass model of species dynamics* above) when juveniles are more vulnerable to predation and subadults are limited most by food availability (top panel;  $q = 0.9$ ,  $\phi = 1.8$ ) and when subadults and adults are more vulnerable to predation and juveniles are limited most by food availability (bottom panel;  $q = 1.2$ ,  $\phi = 0.2$ ). Corresponding food web structures are shown in Figure S8. *B*: Boxplot of minimum (blue bars) and maximum total biomass densities (red bars) as a function of community size for all persisting species in 500 replicate food web simulations using the 3-stage biomass model including juveniles, subadults and adults (see *Stage-structured biomass model of species dynamics* above) when juveniles are more vulnerable to predation and subadults are limited most by food availability (top panel;  $q = 0.9$ ,  $\phi = 1.8$ ) and when subadults and adults are more vulnerable to predation and small juveniles and adults are limited most by food availability (bottom panel;  $q = 1.2$ ,  $\phi = 0.2$ ).

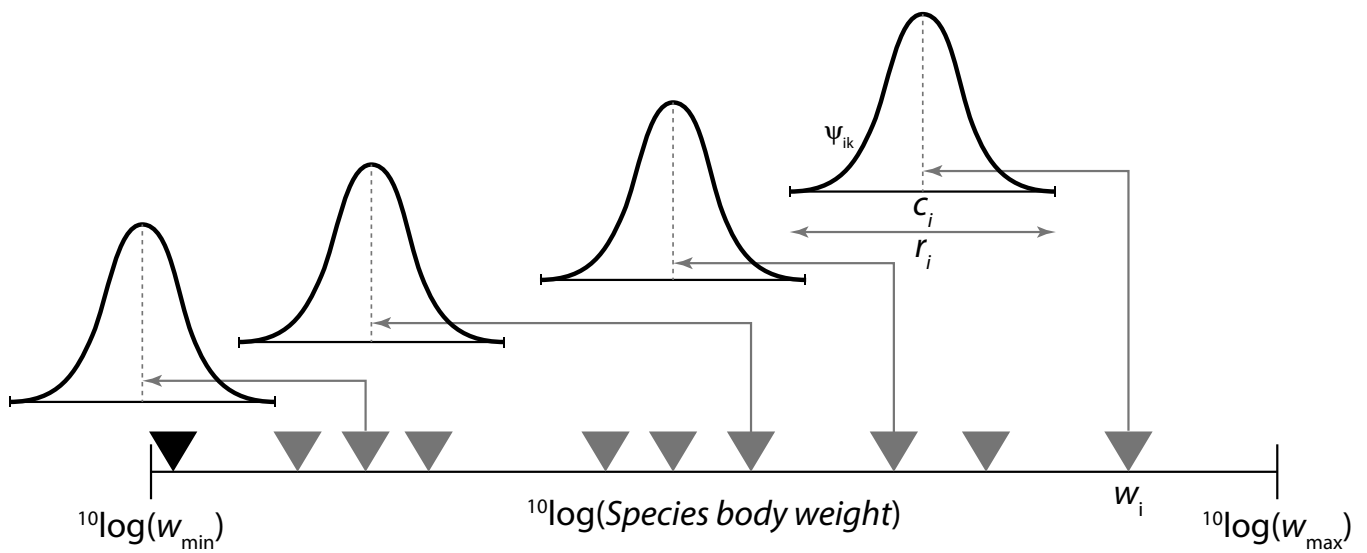

**Fig. S10. Construction of the prey-predator mass ratio food web model** – Species are randomly assigned niche values  $n_i$  in the range  $[0,1]$ . Niche values are related to body size  $w_i$  following  $w_i = (w_{max})^{n_i} (w_{min})^{1-n_i}$  with minimum ( $w_{min}$ ) and maximum body size ( $w_{max}$ ) equal to  $10^{-8}$  and  $10^4$  gram, respectively. The center  $c_i$  of the feeding niche of consumer species is uniformly distributed between  $n_i - 2.5/^{10}\log(w_{max}/w_{min})$  and  $n_i - 0.5/^{10}\log(w_{max}/w_{min})$ , yielding median prey-predator body size ratio between  $10^{-2.5}$  and  $10^{-0.5}$ . The feeding niche width  $r_i$  equals  $1/^{10}\log(w_{max}/w_{min})$ . Consumer species  $i$  feeds on all prey species  $k$  with body sizes between  $(w_{max})^{(c_i-r_i/2)} (w_{min})^{(1-(c_i-r_i/2))}$  and  $(w_{max})^{(c_i+r_i/2)} (w_{min})^{(1-(c_i+r_i/2))}$  at a relative feeding rate  $\psi_{ik}$  following a hump-shaped distribution of prey body size (see Materials and Methods).

305 **References**

- 306 1. Karline Soetaert. *rootSolve: Nonlinear root finding, equilibrium and steady-state analysis of ordinary differential equations*,  
307 2009. R package 1.6.
- 308 2. Karline Soetaert and Peter M.J. Herman. *A Practical Guide to Ecological Modelling. Using R as a Simulation Platform*.  
309 Springer, Dordrecht, The Netherlands, 2009. ISBN 978-1-4020-8623-6.
- 310 3. R Core Team. *R: A language and environment for statistical computing*. R Foundation for Statistical Computing, Vienna,  
311 Austria, 2020.
- 312 4. A M de Roos, T Schellekens, T Van Kooten, K E Van De Wolfshaar, D Claessen, and L Persson. Food-dependent  
313 growth leads to overcompensation in stage-specific biomass when mortality increases: The influence of maturation versus  
314 reproduction regulation. *American Naturalist*, 170:E59–E76, 2007.
- 315 5. A M de Roos, T Schellekens, T Van Kooten, K E Van De Wolfshaar, D Claessen, and L Persson. Simplifying a physiologically  
316 structured population model to a stage-structured biomass model. *Theoretical Population Biology*, 73(1):47–62, 2008.
- 317 6. A M de Roos and L Persson. *Population and community ecology of ontogenetic development*. Monographs in Population  
318 Biology 51. Princeton University Press, Princeton, NJ, 2013.
